# Supplementary material for: Reforming material chemistry of CIGS solar cells via a precise Ag doping strategy
Source: Royal Society of Chemistry journal article supplement (doi:10.1039/d3ta03131d), 2023-01-01
Supplement: d3ta03131d1.pdf [file d3ta03131d1.pdf]

## Supplementary Information

# Reforming material chemistry of CIGS solar cells via a precise Ag doping strategy

Jiseon Hwang,<sup>a,b</sup> Ha Kyung Park,<sup>c</sup> Donghyeop Shin,<sup>a</sup> Inyoung Jung,<sup>a</sup> Inchan Hwang,<sup>a</sup> Young-Joo Eo,<sup>a</sup> Ara Cho,<sup>a</sup> Joo Hyung Park,<sup>a</sup> Soomin Song,<sup>a</sup> Yunae Cho,<sup>a,c</sup> Jihye Gwak,<sup>d,e</sup> Hyo Sik Jang,<sup>\*b</sup> William Jo<sup>\*c</sup> and Kihwan Kim<sup>\*a,e</sup>

<sup>a</sup> Photovoltaics Research Department, Korea Institute of Energy Research, Daejeon 34129, Republic of Korea

<sup>b</sup> Graduate School of Energy Science and Technology (GEST), Chungnam National University, Daejeon 34134, Republic of Korea

<sup>c</sup> Department of Physics, Ewha Womans University, Seoul 03760, Republic of Korea

<sup>d</sup> New and Renewable Energy Institute, Korea Institute of Energy Research, Daejeon 34129, Republic of Korea

<sup>e</sup> University of Science and Technology, Daejeon 34113, Republic of Korea

\* Corresponding authors: [hschang@cnu.ac.kr](mailto:hschang@cnu.ac.kr), [wmjo@ewha.ac.kr](mailto:wmjo@ewha.ac.kr) and [kimkh@kier.re.kr](mailto:kimkh@kier.re.kr)

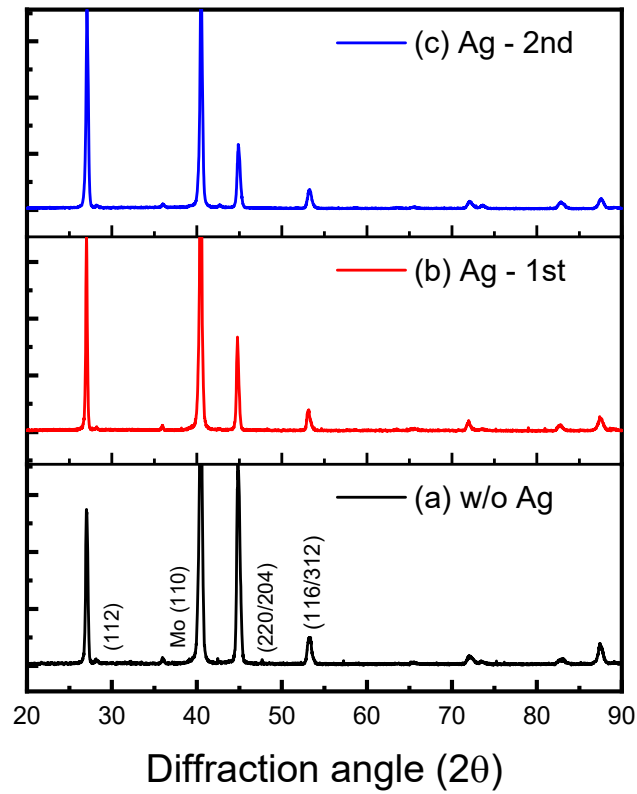

**Fig. S1** XRD ( $\theta$ - $2\theta$  scan) patterns of CIGS and ACIGS films. The Ag incorporation was found to weaken (220)/(204) preferred orientation. The ACIGS films showed (112) preferred orientation similar to the powder pattern of chalcopyrite.

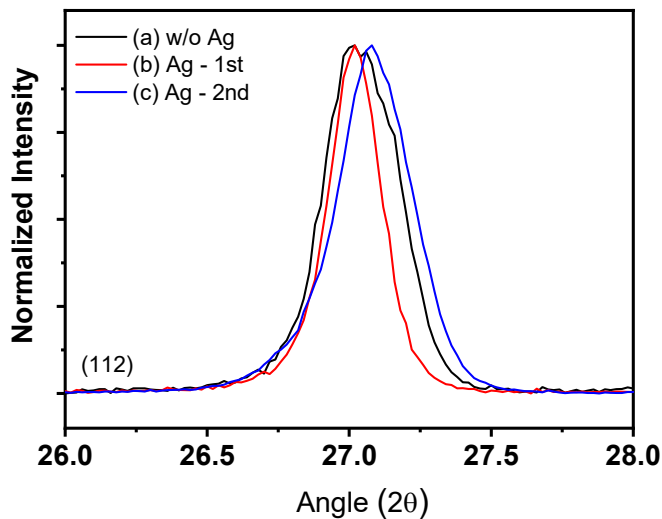

**Fig. S2** (112) XRD ( $\theta$ - $2\theta$  scan) patterns of CIGS films. The CIGS film (i.e., control) shows broad (112) reflections that originate from relatively inhomogeneous Ga/(Ga+In) compositional depth profiles and the ACIGS film (Ag incorporation in the second stage) appeared to exhibit a slightly higher Ga/(Ga+In) ratio than the others, which is verified by the SIMS analyses.

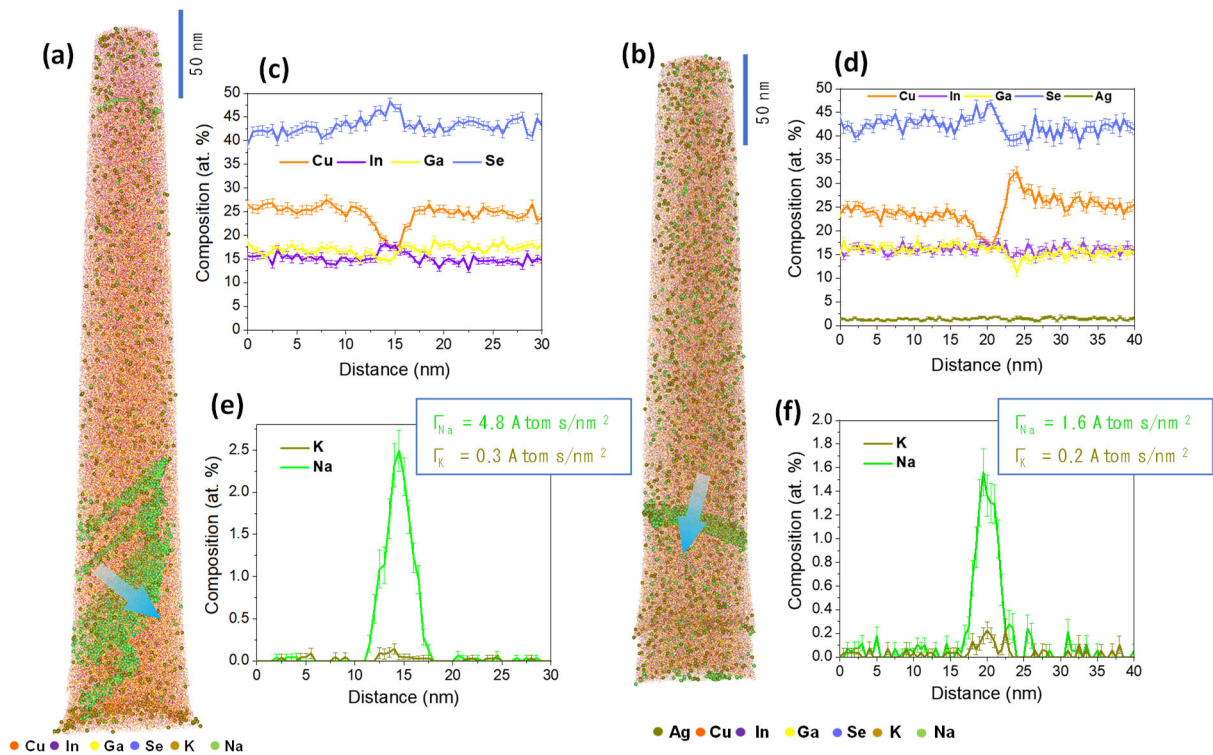

**Fig. S3** Further APT results of CIGS without and with Ag incorporation: 3D atom maps of (a) CIGS and (b) ACIGS specimens; 1D concentration profiles of matrix elements: (c) without and (d) with Ag incorporation; and 1D concentration profiles of alkali (Na and K) elements: (e) without and (f) with Ag incorporation.

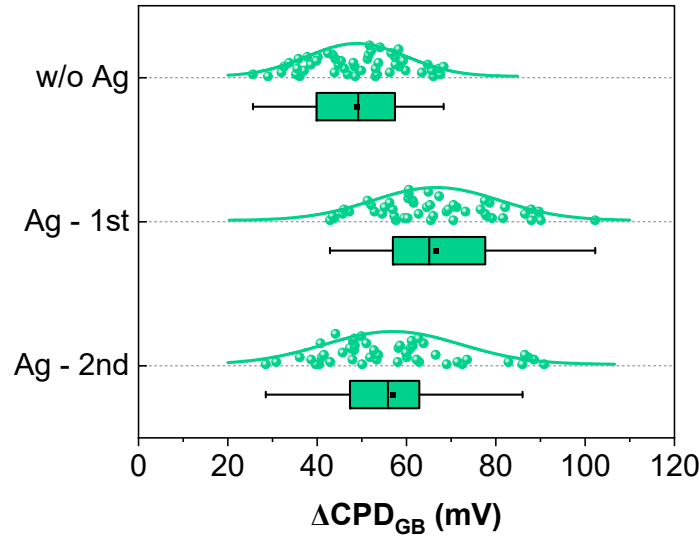

**Fig. S4** Box plot of the extracted  $\Delta\text{CPD}_{\text{GB}}$  values ( $\Delta\text{CPD}_{\text{GB}} = \text{CPD}_{\text{GB}} - \text{CPD}_{\text{IG}}$ ). The CIGS sample with Ag incorporation in the first stage showed the highest average of  $\Delta\text{CPD}_{\text{GB}}$  and that of the CIGS sample without Ag was the lowest. The CIGS sample with Ag incorporation in the second stage showed a relatively wide range of  $\Delta\text{CPD}_{\text{GB}}$  values indicating inhomogeneous CPD value distribution.

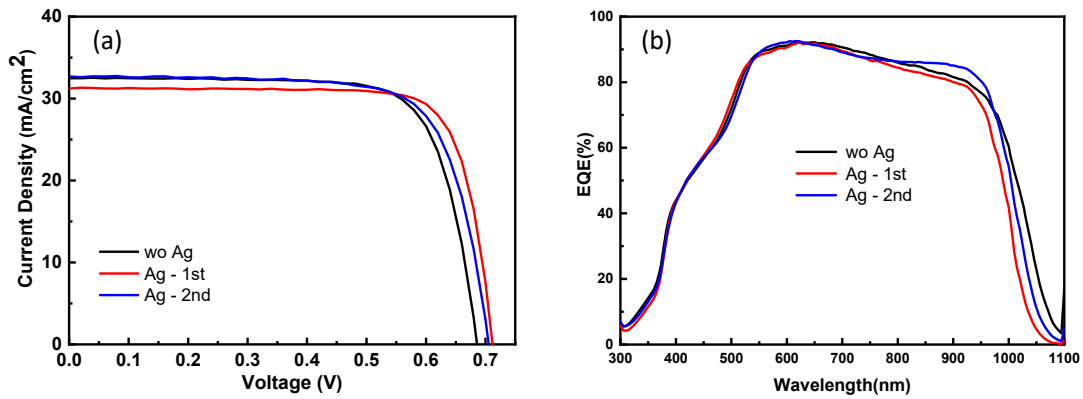

**Fig. S5** Illuminated JV (a) and external quantum efficiency (EQE) (b) curves of the best CIGS solar cells in each case.

**Table S1.** Illuminated JV characteristics of CIGS solar cells of Fig. S5.

|              | Eff (%) | FF (%) | $V_{\text{oc}}$ (V) | $J_{\text{sc}}$ (mA/cm <sup>2</sup> ) |
|--------------|---------|--------|---------------------|---------------------------------------|
| (a) wo Ag    | 16.7    | 75.1   | 0.686               | 32.5                                  |
| (b) Ag – 1st | 17.6    | 79.2   | 0.712               | 31.2                                  |
| (c) Ag – 2nd | 17.0    | 73.8   | 0.705               | 32.7                                  |

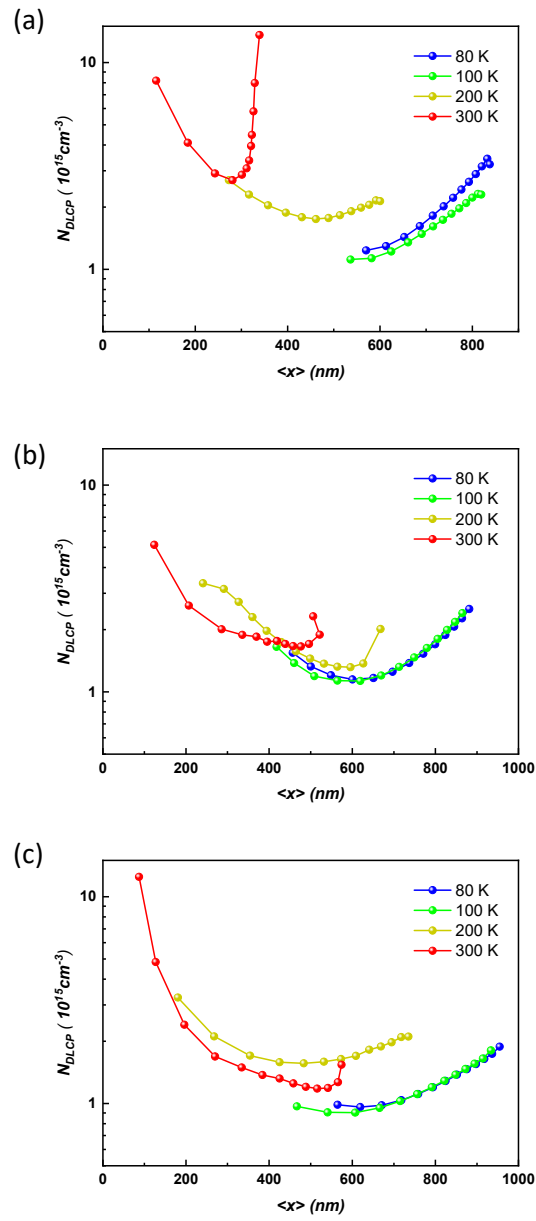

**Fig. S6** Drive-level capacitance profiling (DLCP) curves of CIGS solar cells: (a) control, (b) Ag incorporation in the first stage, and (c) Ag incorporation in the second stage.

**Table S2.** Moment of charge response ( $\langle x \rangle$ ) and drive-level density ( $N_{\text{DLCP}}$ ) values derived from Fig. S6.

|                         | Temperature | $\langle x \rangle$ nm | $N_{\text{DLCP}}$ ( $10^{15}/\text{cm}^3$ ) |
|-------------------------|-------------|------------------------|---------------------------------------------|
| Without Ag<br>(control) | 80 K        | 714.40                 | 1.82                                        |
|                         | 100 K       | 690.40                 | 1.49                                        |
|                         | 200 K       | 431.01                 | 1.79                                        |
|                         | 300 K       | 301.12                 | 2.87                                        |
| Ag - first stage        | 80 K        | 651.06                 | 1.17                                        |
|                         | 100 K       | 619.27                 | 1.13                                        |
|                         | 200 K       | 394.02                 | 1.98                                        |
|                         | 300 K       | 369.66                 | 1.85                                        |
| Ag - second<br>stage    | 80 K        | 758.85                 | 1.11                                        |
|                         | 100 K       | 715.24                 | 1.02                                        |
|                         | 200 K       | 483.38                 | 1.56                                        |
|                         | 300 K       | 334.22                 | 1.49                                        |
